# Supplementary material for: Singlet fission relevant energetics from optimally tuned range-separated hybrids
Source: Royal Society of Chemistry journal article supplement (doi:10.1039/d0cp03951a), 2020-01-01
Supplement: d0cp03951a1.pdf [file d0cp03951a1.pdf]

Supporting Information for the paper entitled:

**Singlet fission relevant energetics from optimally tuned range-separated hybrids**

Mojtaba Alipour\* and Zahra Safari

*Department of Chemistry, School of Science, Shiraz University, Shiraz 71946-84795, Iran*

\* Corresponding Author.

E-mail: malipour@shirazu.ac.ir.

Phone: +98 71 36137160.

Fax: +98 71 36460788.

---

**Table S1.** The computed values of the singlet excitation energies (eV) for the experimentally known SF chromophores under study.

| Chromophore | $\alpha = 0.0, \beta = 1.0$ |      |      | $\alpha = 0.05, \beta = 0.95$ |      |      |
|-------------|-----------------------------|------|------|-------------------------------|------|------|
|             | BLYP                        | PBE  | TPSS | BLYP                          | PBE  | TPSS |
| <b>I</b>    | 2.61                        | 2.62 | 2.63 | 2.60                          | 2.61 | 2.62 |
| <b>II</b>   | 3.13                        | 3.15 | 3.16 | 3.16                          | 3.17 | 3.18 |
| <b>III</b>  | 2.59                        | 2.59 | 2.61 | 2.60                          | 2.61 | 2.62 |
| <b>IV</b>   | 2.57                        | 2.57 | 2.59 | 2.56                          | 2.56 | 2.58 |
| <b>V</b>    | 2.11                        | 2.11 | 2.13 | 2.12                          | 2.12 | 2.14 |
| <b>VI</b>   | 2.15                        | 2.16 | 2.17 | 2.17                          | 2.17 | 2.19 |
| <b>VII</b>  | 2.12                        | 2.12 | 2.14 | 2.14                          | 2.14 | 2.15 |
| <b>VIII</b> | 2.08                        | 2.08 | 2.10 | 2.10                          | 2.10 | 2.12 |

| Chromophor<br>e | $\alpha = 0.10, \beta = 0.90$ |      |      | $\alpha = 0.15, \beta = 0.85$ |      |      |
|-----------------|-------------------------------|------|------|-------------------------------|------|------|
|                 | BLY                           | PBE  | TPS  | BLY                           | PBE  | TPS  |
|                 | P                             | PBE  | S    | P                             | PBE  | S    |
| <b>I</b>        | 2.62                          | 2.63 | 2.64 | 2.60                          | 2.60 | 2.61 |
| <b>II</b>       | 3.14                          | 3.16 | 3.17 | 3.16                          | 3.17 | 3.18 |
| <b>III</b>      | 2.64                          | 2.64 | 2.66 | 2.63                          | 2.63 | 2.65 |
| <b>IV</b>       | 2.58                          | 2.58 | 2.60 | 2.59                          | 2.60 | 2.61 |
| <b>V</b>        | 2.13                          | 2.14 | 2.15 | 2.14                          | 2.15 | 2.16 |
| <b>VI</b>       | 2.18                          | 2.18 | 2.20 | 2.19                          | 2.20 | 2.21 |
| <b>VII</b>      | 2.15                          | 2.15 | 2.17 | 2.17                          | 2.17 | 2.18 |
| <b>VIII</b>     | 2.12                          | 2.12 | 2.14 | 2.14                          | 2.14 | 2.15 |

| Chromophore | $\alpha = 0.20, \beta = 0.80$ |      |      |
|-------------|-------------------------------|------|------|
|             | BLYP                          | PBE  | TPSS |
| <b>I</b>    | 2.60                          | 2.60 | 2.61 |
| <b>II</b>   | 3.14                          | 3.15 | 3.16 |
| <b>III</b>  | 2.64                          | 2.65 | 2.66 |
| <b>IV</b>   | 2.61                          | 2.62 | 2.63 |
| <b>V</b>    | 2.15                          | 2.16 | 2.17 |
| <b>VI</b>   | 2.21                          | 2.21 | 2.22 |
| <b>VII</b>  | 2.18                          | 2.18 | 2.20 |
| <b>VII</b>  | 2.15                          | 2.15 | 2.17 |

**Table S2.** The computed values of the first triplet excitation energies (eV) for the experimentally known SF chromophores under study.

| Chromophore | $\alpha = 0.0, \beta = 1.0$ |      |      | $\alpha = 0.05, \beta = 0.95$ |      |      |
|-------------|-----------------------------|------|------|-------------------------------|------|------|
|             | BLYP                        | PBE  | TPSS | BLYP                          | PBE  | TPSS |
| <b>I</b>    | 1.13                        | 1.11 | 1.09 | 1.11                          | 1.10 | 1.08 |
| <b>II</b>   | 1.58                        | 1.56 | 1.54 | 1.57                          | 1.55 | 1.53 |
| <b>III</b>  | 1.28                        | 1.26 | 1.25 | 1.27                          | 1.25 | 1.24 |
| <b>IV</b>   | 1.34                        | 1.32 | 1.30 | 1.33                          | 1.31 | 1.29 |
| <b>V</b>    | 0.85                        | 0.83 | 0.81 | 0.84                          | 0.82 | 0.80 |
| <b>VI</b>   | 0.87                        | 0.86 | 0.84 | 0.86                          | 0.85 | 0.83 |
| <b>VII</b>  | 0.86                        | 0.85 | 0.83 | 0.86                          | 0.84 | 0.82 |
| <b>VIII</b> | 0.85                        | 0.84 | 0.82 | 0.85                          | 0.83 | 0.82 |

| Chromophor<br>e | $\alpha = 0.10, \beta = 0.90$ |      |      | $\alpha = 0.15, \beta = 0.85$ |      |      |
|-----------------|-------------------------------|------|------|-------------------------------|------|------|
|                 | BLY                           | PBE  | TPS  | BLY                           | PBE  | TPS  |
|                 | P                             |      | S    | P                             |      | S    |
| <b>I</b>        | 1.10                          | 1.08 | 1.06 | 1.09                          | 1.07 | 1.05 |
| <b>II</b>       | 1.56                          | 1.54 | 1.52 | 1.55                          | 1.53 | 1.51 |
| <b>III</b>      | 1.27                          | 1.25 | 1.24 | 1.26                          | 1.24 | 1.23 |
| <b>IV</b>       | 1.32                          | 1.30 | 1.29 | 1.32                          | 1.30 | 1.28 |
| <b>V</b>        | 0.83                          | 0.81 | 0.79 | 0.82                          | 0.80 | 0.78 |
| <b>VI</b>       | 0.86                          | 0.84 | 0.82 | 0.85                          | 0.83 | 0.82 |
| <b>VII</b>      | 0.85                          | 0.83 | 0.81 | 0.84                          | 0.82 | 0.81 |
| <b>VIII</b>     | 0.84                          | 0.82 | 0.81 | 0.83                          | 0.81 | 0.80 |

| Chromophore | $\alpha = 0.20, \beta = 0.80$ |      |      |
|-------------|-------------------------------|------|------|
|             | BLYP                          | PBE  | TPSS |
| <b>I</b>    | 1.07                          | 1.05 | 1.03 |
| <b>II</b>   | 1.53                          | 1.51 | 1.50 |
| <b>III</b>  | 1.25                          | 1.23 | 1.22 |
| <b>IV</b>   | 1.31                          | 1.29 | 1.27 |
| <b>V</b>    | 0.81                          | 0.79 | 0.77 |
| <b>VI</b>   | 0.84                          | 0.82 | 0.81 |
| <b>VII</b>  | 0.83                          | 0.81 | 0.80 |
| <b>VIII</b> | 0.82                          | 0.80 | 0.79 |

**Table S3.** The computed values of the second triplet excitation energies (eV) for the experimentally known SF chromophores under study.

| Chromophore | $\alpha = 0.0, \beta = 1.0$ |      |      | $\alpha = 0.05, \beta = 0.95$ |      |      |
|-------------|-----------------------------|------|------|-------------------------------|------|------|
|             | BLYP                        | PBE  | TPSS | BLYP                          | PBE  | TPSS |
| <b>I</b>    | 2.21                        | 2.20 | 2.18 | 2.20                          | 2.19 | 2.17 |
| <b>II</b>   | 2.82                        | 2.80 | 2.79 | 2.81                          | 2.80 | 2.78 |
| <b>III</b>  | 2.48                        | 2.47 | 2.46 | 2.48                          | 2.47 | 2.46 |
| <b>IV</b>   | 2.57                        | 2.56 | 2.55 | 2.57                          | 2.55 | 2.55 |
| <b>V</b>    | 2.12                        | 2.11 | 2.10 | 2.12                          | 2.11 | 2.10 |
| <b>VI</b>   | 2.22                        | 2.21 | 2.20 | 2.22                          | 2.21 | 2.20 |
| <b>VII</b>  | 2.12                        | 2.11 | 2.11 | 2.13                          | 2.12 | 2.11 |
| <b>VIII</b> | 2.10                        | 2.09 | 2.09 | 2.11                          | 2.10 | 2.10 |

| Chromophore | $\alpha = 0.10, \beta = 0.90$ |      |      | $\alpha = 0.15, \beta = 0.85$ |      |      |
|-------------|-------------------------------|------|------|-------------------------------|------|------|
|             | BLYP                          | PBE  | TPS  | BLYP                          | PBE  | TPS  |
|             | P                             | PBE  | S    | P                             | PBE  | S    |
| <b>I</b>    | 2.20                          | 2.18 | 2.17 | 2.19                          | 2.17 | 2.16 |
| <b>II</b>   | 2.80                          | 2.79 | 2.77 | 2.80                          | 2.78 | 2.77 |
| <b>III</b>  | 2.49                          | 2.48 | 2.47 | 2.48                          | 2.47 | 2.47 |
| <b>IV</b>   | 2.57                          | 2.55 | 2.55 | 2.57                          | 2.55 | 2.55 |
| <b>V</b>    | 2.12                          | 2.10 | 2.10 | 2.12                          | 2.10 | 2.10 |
| <b>VI</b>   | 2.22                          | 2.21 | 2.20 | 2.22                          | 2.21 | 2.20 |
| <b>VII</b>  | 2.14                          | 2.12 | 2.12 | 2.14                          | 2.13 | 2.12 |
| <b>VIII</b> | 2.12                          | 2.11 | 2.11 | 2.13                          | 2.11 | 2.11 |

| Chromophore | $\alpha = 0.20, \beta = 0.80$ |      |      |
|-------------|-------------------------------|------|------|
|             | BLYP                          | PBE  | TPSS |
| <b>I</b>    | 2.18                          | 2.16 | 2.15 |
| <b>II</b>   | 2.79                          | 2.77 | 2.76 |
| <b>III</b>  | 2.49                          | 2.47 | 2.47 |
| <b>IV</b>   | 2.57                          | 2.55 | 2.55 |
| <b>V</b>    | 2.11                          | 2.10 | 2.09 |
| <b>VI</b>   | 2.22                          | 2.21 | 2.20 |
| <b>VII</b>  | 2.15                          | 2.13 | 2.13 |
| <b>VIII</b> | 2.13                          | 2.12 | 2.12 |

**Table S4.** The computed values of the SF energy gap (eV) for the experimentally known SF chromophores under study. Also given in the table are the experimental data used as reference.

| Chromophore | $\alpha = 0.0, \beta = 1.0$ |       |       | $\alpha = 0.05, \beta = 0.95$ |       |       |       |
|-------------|-----------------------------|-------|-------|-------------------------------|-------|-------|-------|
|             | Ref.                        | BLYP  | PBE   | TPSS                          | BLYP  | PBE   | TPSS  |
| <b>I</b>    | -0.40                       | -0.36 | -0.40 | -0.46                         | -0.38 | -0.42 | -0.47 |
| <b>II</b>   | -0.07                       | 0.02  | -0.03 | -0.08                         | -0.02 | -0.07 | -0.11 |
| <b>III</b>  | -0.17                       | -0.04 | -0.07 | -0.12                         | -0.06 | -0.10 | -0.14 |
| <b>IV</b>   | -0.07                       | 0.11  | 0.07  | 0.02                          | 0.09  | 0.05  | 0.01  |
| <b>V</b>    | -0.34                       | -0.42 | -0.45 | -0.50                         | -0.45 | -0.48 | -0.53 |
| <b>VI</b>   | -0.31                       | -0.41 | -0.44 | -0.49                         | -0.44 | -0.47 | -0.52 |
| <b>VII</b>  | -0.32                       | -0.40 | -0.43 | -0.48                         | -0.43 | -0.46 | -0.51 |
| <b>VIII</b> | -0.34                       | -0.37 | -0.40 | -0.46                         | -0.41 | -0.44 | -0.49 |

| Chromophore | $\alpha = 0.10, \beta = 0.90$ |       |       | $\alpha = 0.15, \beta = 0.85$ |       |       |
|-------------|-------------------------------|-------|-------|-------------------------------|-------|-------|
|             | BLYP                          | PBE   | TPSS  | BLYP                          | PBE   | TPSS  |
| <b>I</b>    | -0.41                         | -0.46 | -0.51 | -0.42                         | -0.47 | -0.52 |
| <b>II</b>   | -0.03                         | -0.08 | -0.13 | -0.06                         | -0.11 | -0.16 |
| <b>III</b>  | -0.10                         | -0.14 | -0.18 | -0.11                         | -0.15 | -0.19 |
| <b>IV</b>   | 0.07                          | 0.02  | -0.02 | 0.04                          | -0.01 | -0.05 |
| <b>V</b>    | -0.48                         | -0.51 | -0.56 | -0.51                         | -0.55 | -0.59 |
| <b>VI</b>   | -0.47                         | -0.50 | -0.55 | -0.50                         | -0.54 | -0.58 |
| <b>VII</b>  | -0.46                         | -0.49 | -0.54 | -0.49                         | -0.53 | -0.57 |
| <b>VIII</b> | -0.44                         | -0.47 | -0.52 | -0.47                         | -0.51 | -0.55 |

| Chromophore | $\alpha = 0.20, \beta = 0.80$ |       |       |
|-------------|-------------------------------|-------|-------|
|             | BLYP                          | PBE   | TPSS  |
| <b>I</b>    | -0.45                         | -0.50 | -0.54 |
| <b>II</b>   | -0.07                         | -0.13 | -0.17 |
| <b>III</b>  | -0.14                         | -0.18 | -0.22 |
| <b>IV</b>   | 0.01                          | -0.04 | -0.08 |
| <b>V</b>    | -0.54                         | -0.58 | -0.62 |
| <b>VI</b>   | -0.53                         | -0.57 | -0.61 |
| <b>VII</b>  | -0.53                         | -0.56 | -0.61 |

**Table S5.** The computed values of the TT energy gap (eV) for the experimentally known SF chromophores under study.

| Chromophore | $\alpha = 0.0, \beta = 1.0$ |       |       | $\alpha = 0.05, \beta = 0.95$ |       |       |
|-------------|-----------------------------|-------|-------|-------------------------------|-------|-------|
|             | BLYP                        | PBE   | TPSS  | BLYP                          | PBE   | TPSS  |
| <b>I</b>    | 0.05                        | 0.03  | 0.00  | 0.03                          | 0.00  | -0.02 |
| <b>II</b>   | 0.34                        | 0.32  | 0.30  | 0.33                          | 0.31  | 0.28  |
| <b>III</b>  | 0.07                        | 0.05  | 0.03  | 0.06                          | 0.04  | 0.02  |
| <b>IV</b>   | 0.10                        | 0.08  | 0.06  | 0.09                          | 0.06  | 0.04  |
| <b>V</b>    | -0.43                       | -0.44 | -0.47 | -0.44                         | -0.46 | -0.49 |
| <b>VI</b>   | -0.47                       | -0.49 | -0.52 | -0.49                         | -0.51 | -0.54 |
| <b>VII</b>  | -0.39                       | -0.41 | -0.45 | -0.42                         | -0.44 | -0.47 |
| <b>VIII</b> | -0.39                       | -0.41 | -0.45 | -0.42                         | -0.44 | -0.47 |

| Chromophor<br>e | $\alpha = 0.10, \beta = 0.90$ |       |          | $\alpha = 0.15, \beta = 0.85$ |       |          |
|-----------------|-------------------------------|-------|----------|-------------------------------|-------|----------|
|                 | BLY<br>P                      | PBE   | TPS<br>S | BLY<br>P                      | PBE   | TPS<br>S |
| <b>I</b>        | 0.01                          | -0.01 | -0.04    | -0.01                         | -0.04 | -0.06    |
| <b>II</b>       | 0.31                          | 0.29  | 0.27     | 0.30                          | 0.30  | 0.25     |
| <b>III</b>      | 0.05                          | 0.03  | 0.00     | 0.03                          | 0.01  | -0.01    |
| <b>IV</b>       | 0.07                          | 0.05  | 0.03     | 0.06                          | 0.04  | 0.02     |
| <b>V</b>        | -0.46                         | -0.48 | -0.51    | -0.48                         | -0.50 | -0.53    |
| <b>VI</b>       | -0.51                         | -0.53 | -0.55    | -0.53                         | -0.55 | -0.57    |
| <b>VII</b>      | -0.44                         | -0.46 | -0.49    | -0.47                         | -0.49 | -0.51    |

| VIII        | -0.44                         | -0.46 | -0.49 | -0.46 | -0.49 | -0.51 |
|-------------|-------------------------------|-------|-------|-------|-------|-------|
| Chromophore | $\alpha = 0.20, \beta = 0.80$ |       |       |       |       |       |
|             | BLYP                          | PBE   | TPSS  |       |       |       |
| I           | -0.03                         | -0.06 | -0.08 |       |       |       |
| II          | 0.28                          | 0.26  | 0.24  |       |       |       |
| III         | 0.02                          | 0.00  | -0.02 |       |       |       |
| IV          | 0.05                          | 0.02  | 0.00  |       |       |       |
| V           | -0.50                         | -0.52 | -0.54 |       |       |       |
| VI          | -0.54                         | -0.57 | -0.59 |       |       |       |
| VII         | -0.49                         | -0.51 | -0.54 |       |       |       |
| VIII        | -0.49                         | -0.51 | -0.54 |       |       |       |

**Table S6.** The computed values of the singlet and first triplet excitation energies (eV) using the best proposed OT-RSH based on TPSS DFA, TPSS ( $\alpha = 0.10, \beta = 0.90$ ), and its standard version, LC-TPSS, for the experimentally known SF chromophores under study. Also given in the table are the experimental data used as reference.

| Chromophore        | Singlet excitation energies |                                        |         | Triplet excitation energies <sup>j</sup> |                                        |         |
|--------------------|-----------------------------|----------------------------------------|---------|------------------------------------------|----------------------------------------|---------|
|                    | Ref.                        | TPSS ( $\alpha = 0.10, \beta = 0.90$ ) | LC-TPSS | Ref.                                     | TPSS ( $\alpha = 0.10, \beta = 0.90$ ) | LC-TPSS |
| I <sup>a, b</sup>  | 2.30                        | 2.64                                   | 2.95    | 0.95                                     | 1.06 (0.83)                            | 1.05    |
| II <sup>c-e</sup>  | 2.63                        | 3.17                                   | 3.50    | 1.28                                     | 1.52 (1.26)                            | 1.52    |
| III <sup>f</sup>   | 2.25                        | 2.66                                   | 3.07    | 1.04                                     | 1.24 (1.01)                            | 1.25    |
| IV <sup>g, h</sup> | 2.35                        | 2.60                                   | 3.09    | 1.14                                     | 1.29 (1.03)                            | 1.33    |
| V <sup>i</sup>     | 1.90                        | 2.15                                   | 2.54    | 0.78                                     | 0.79 (0.57)                            | 0.77    |
| VI <sup>i</sup>    | 1.91                        | 2.20                                   | 2.59    | 0.80                                     | 0.82 (0.58)                            | 0.80    |
| VII <sup>i</sup>   | 1.92                        | 2.17                                   | 2.57    | 0.80                                     | 0.81 (0.59)                            | 0.79    |
| VIII <sup>i</sup>  | 1.88                        | 2.14                                   | 2.57    | 0.77                                     | 0.81 (0.57)                            | 0.80    |

<sup>a</sup> E. Heinecke, D. Hartmann, R. Muller and A. Hese, *J. Chem. Phys.*, 1998, **109**, 906-911.

<sup>b</sup> N. Nijegorodov, V. Ramachandran and D. P. Winkoun, *Spectrochim. Acta, Part A*, 1997, **53**, 1813-1824.

- <sup>c</sup> Y. Tomkiewicz, R. P. Groff and P. Avakian, *J. Chem. Phys.*, 1971, **54**, 4504-4507.
- <sup>d</sup> J. Burgos, M. Pope, C. E. Swenberg and R. R. Alfano, *Physica Status Solidi (b)*, 1977, **83**, 249-256.
- <sup>e</sup> N. Sabbatini, M. T. Indelli, M. T. Gandolfi and V. Balzani, *J. Phys. Chem.*, 1982, **86**, 3585-3591.
- <sup>f</sup> E. A. Margulies, Y.-L. Wu, P. Gawel, S. A. Miller, L. E. Shoer, R. D. Schaller, F. Diederich and M. R. Wasielewski, *Angew. Chem. Int. Ed.*, 2015, **54**, 8679–8683.
- <sup>g</sup> S. Tavazzi, A. Borghesi, A. Papagni, P. Spearman, L. Silvestri, A. Yassar, A. Camposeo, M. Polo and D. Pisignano, *Phys. Rev. B: Condens. Matter Mater. Phys.*, 2007, **75**, 245416.
- <sup>h</sup> W. G. Herkstroeter and P. B. Merkel, *J. Photochem.*, 1981, **16**, 331- 341.
- <sup>i</sup> Y.-D. Zhang, Y. Wu, Y. Xu, Q. Wang, K. Liu, J.-W. Chen, J.-J. Cao, C. Zhang, H. Fu and H.-L. Zhang, *J. Am. Chem. Soc.*, 2016, **138**, 6739-6745.
- <sup>j</sup> The adiabatic triplet excitation energies are given in the parentheses.

**Table S7.** The computed values of the singlet and first triplet excitation energies (eV) using the best proposed OT-RSH based on PBE DFA, PBE ( $\alpha = 0.15, \beta = 0.85$ ), and its standard version, LC-PBE, for the experimentally known SF chromophores under study. Also given in the table are the experimental data used as reference.

| Chromophore               | Singlet excitation energies |                                       |        | Triplet excitation energies <sup>j</sup> |                                       |        |
|---------------------------|-----------------------------|---------------------------------------|--------|------------------------------------------|---------------------------------------|--------|
|                           | Ref.                        | PBE ( $\alpha = 0.15, \beta = 0.85$ ) | LC-PBE | Ref.                                     | PBE ( $\alpha = 0.15, \beta = 0.85$ ) | LC-PBE |
| <b>I</b> <sup>a, b</sup>  | 2.30                        | 2.60                                  | 2.95   | 0.95                                     | 1.07 (0.85)                           | 1.06   |
| <b>II</b> <sup>c-e</sup>  | 2.63                        | 3.17                                  | 3.50   | 1.28                                     | 1.53 (1.28)                           | 1.54   |
| <b>III</b> <sup>f</sup>   | 2.25                        | 2.63                                  | 3.07   | 1.04                                     | 1.24 (1.00)                           | 1.27   |
| <b>IV</b> <sup>g, h</sup> | 2.35                        | 2.60                                  | 3.09   | 1.14                                     | 1.30 (1.06)                           | 1.34   |
| <b>V</b> <sup>i</sup>     | 1.90                        | 2.15                                  | 2.54   | 0.78                                     | 0.80 (0.61)                           | 0.78   |
| <b>VI</b> <sup>i</sup>    | 1.91                        | 2.20                                  | 2.59   | 0.80                                     | 0.83 (0.60)                           | 0.82   |
| <b>VII</b> <sup>i</sup>   | 1.92                        | 2.17                                  | 2.57   | 0.80                                     | 0.82 (0.61)                           | 0.81   |
| <b>VIII</b> <sup>i</sup>  | 1.88                        | 2.14                                  | 2.57   | 0.77                                     | 0.81 (0.59)                           | 0.81   |

<sup>a</sup> E. Heinecke, D. Hartmann, R. Muller and A. Hese, *J. Chem. Phys.*, 1998, **109**, 906-911.

<sup>b</sup> N. Nijegorodov, V. Ramachandran and D. P. Winkoun, *Spectrochim. Acta, Part A*, 1997, **53**, 1813-1824.



- <sup>c</sup> Y. Tomkiewicz, R. P. Groff and P. Avakian, *J. Chem. Phys.*, 1971, **54**, 4504-4507.
- <sup>d</sup> J. Burgos, M. Pope, C. E. Swenberg and R. R. Alfano, *Physica Status Solidi (b)*, 1977, **83**, 249-256.
- <sup>e</sup> N. Sabbatini, M. T. Indelli, M. T. Gandolfi and V. Balzani, *J. Phys. Chem.*, 1982, **86**, 3585-3591.
- <sup>f</sup> E. A. Margulies, Y.-L. Wu, P. Gawel, S. A. Miller, L. E. Shoer, R. D. Schaller, F. Diederich and M. R. Wasielewski, *Angew. Chem. Int. Ed.*, 2015, **54**, 8679–8683.
- <sup>g</sup> S. Tavazzi, A. Borghesi, A. Papagni, P. Spearman, L. Silvestri, A. Yassar, A. Camposeo, M. Polo and D. Pisignano, *Phys. Rev. B: Condens. Matter Mater. Phys.*, 2007, **75**, 245416.
- <sup>h</sup> W. G. Herkstroeter and P. B. Merkel, *J. Photochem.*, 1981, **16**, 331- 341.
- <sup>i</sup> Y.-D. Zhang, Y. Wu, Y. Xu, Q. Wang, K. Liu, J.-W. Chen, J.-J. Cao, C. Zhang, H. Fu and H.-L. Zhang, *J. Am. Chem. Soc.*, 2016, **138**, 6739-6745.
- <sup>j</sup> The adiabatic triplet excitation energies are given in the parentheses.

**Table S8.** Statistical metrics (eV) on the performance of the best OT-RSHs in this work in the calculations of the singlet and triplet excitation energies for the experimentally known SF chromophores under study. Also given in the table are the corresponding data for the standard counterparts.

| RSHs                                   | MSD          | MAD         | MaxAD       | MinAD       | RMSD        |
|----------------------------------------|--------------|-------------|-------------|-------------|-------------|
| Singlet excitation energy              |              |             |             |             |             |
| <i>OT-RSHs</i>                         |              |             |             |             |             |
| TPSS ( $\alpha = 0.10, \beta = 0.90$ ) | 0.32         | 0.32        | 0.54        | 0.25        | 0.34        |
| PBE ( $\alpha = 0.15, \beta = 0.85$ )  | 0.31         | 0.31        | 0.54        | 0.25        | 0.33        |
| <i>Standard RSHs</i>                   |              |             |             |             |             |
| LC-TPSS                                | 0.72         | 0.72        | 0.87        | 0.64        | 0.72        |
| LC-PBE                                 | 0.72         | 0.72        | 0.87        | 0.64        | 0.72        |
| Triplet excitation energy <sup>a</sup> |              |             |             |             |             |
| <i>OT-RSHs</i>                         |              |             |             |             |             |
| TPSS ( $\alpha = 0.10, \beta = 0.90$ ) | 0.10 (-0.14) | 0.10 (0.14) | 0.24 (0.22) | 0.01 (0.02) | 0.13 (0.16) |
| PBE ( $\alpha = 0.15, \beta = 0.85$ )  | 0.10 (-0.12) | 0.10 (0.12) | 0.25 (0.20) | 0.02 (0.00) | 0.13 (0.14) |

*Standard RSHs*

|         |      |      |      |      |      |
|---------|------|------|------|------|------|
| LC-TPSS | 0.10 | 0.10 | 0.24 | 0.00 | 0.14 |
| LC-PBE  | 0.11 | 0.11 | 0.26 | 0.00 | 0.15 |

<sup>a</sup> The metrics on the adiabatic triplet excitation energies are given in the parentheses.

**Table S9.** The computed values of the singlet excitation energies (eV) based on the considered solvation models for the experimentally known SF chromophores under study.

| Chromophore | OT-RSHs-PCM                            |                                       | OT-SRSHs <sup>a</sup>                  |                                       |
|-------------|----------------------------------------|---------------------------------------|----------------------------------------|---------------------------------------|
|             | TPSS ( $\alpha = 0.10, \beta = 0.90$ ) | PBE ( $\alpha = 0.15, \beta = 0.85$ ) | TPSS ( $\alpha = 0.10, \beta = 0.32$ ) | PBE ( $\alpha = 0.15, \beta = 0.27$ ) |
| <b>I</b>    | 2.56                                   | 2.53                                  | 2.52                                   | 2.24                                  |
| <b>II</b>   | 3.11                                   | 3.11                                  | 2.79                                   | 2.79                                  |
| <b>III</b>  | 2.58                                   | 2.55                                  | 2.37                                   | 2.37                                  |
| <b>IV</b>   | 2.54                                   | 2.54                                  | 2.37                                   | 2.38                                  |
| <b>V</b>    | 2.05                                   | 2.05                                  | 1.90                                   | 1.91                                  |
| <b>VI</b>   | 2.11                                   | 2.11                                  | 1.96                                   | 1.97                                  |
| <b>VII</b>  | 2.08                                   | 2.08                                  | 1.92                                   | 1.93                                  |
| <b>VIII</b> | 2.05                                   | 2.05                                  | 1.86                                   | 1.87                                  |

<sup>a</sup> In toluene solvent with the dielectric constant of about 2.37.

**Table S10.** The computed values of the first triplet excitation energies (eV) based on the considered solvation models for the experimentally known SF chromophores under study.

| Chromophore | OT-RSHs-PCM                            |                                       | OT-SRSHs <sup>a</sup>                  |                                       |
|-------------|----------------------------------------|---------------------------------------|----------------------------------------|---------------------------------------|
|             | TPSS ( $\alpha = 0.10, \beta = 0.90$ ) | PBE ( $\alpha = 0.15, \beta = 0.85$ ) | TPSS ( $\alpha = 0.10, \beta = 0.32$ ) | PBE ( $\alpha = 0.15, \beta = 0.27$ ) |
| <b>I</b>    | 1.06                                   | 1.07                                  | 0.99                                   | 1.00                                  |
| <b>II</b>   | 1.52                                   | 1.53                                  | 1.45                                   | 1.45                                  |
| <b>III</b>  | 1.24                                   | 1.25                                  | 1.20                                   | 1.20                                  |
| <b>IV</b>   | 1.29                                   | 1.30                                  | 1.24                                   | 1.25                                  |
| <b>V</b>    | 0.79                                   | 0.80                                  | 0.77                                   | 0.78                                  |
| <b>VI</b>   | 0.83                                   | 0.84                                  | 0.80                                   | 0.81                                  |
| <b>VII</b>  | 0.82                                   | 0.82                                  | 0.79                                   | 0.80                                  |
| <b>VIII</b> | 0.81                                   | 0.82                                  | 0.77                                   | 0.78                                  |

<sup>a</sup> In toluene solvent with the dielectric constant of about 2.37.

**Table S11.** The computed values of the second triplet excitation energies (eV) based on the considered solvation models for the experimentally known SF chromophores under study.

| Chromophore | OT-RSHs-PCM                            |                                       | OT-SRSHs <sup>a</sup>                  |                                       |
|-------------|----------------------------------------|---------------------------------------|----------------------------------------|---------------------------------------|
|             | TPSS ( $\alpha = 0.10, \beta = 0.90$ ) | PBE ( $\alpha = 0.15, \beta = 0.85$ ) | TPSS ( $\alpha = 0.10, \beta = 0.32$ ) | PBE ( $\alpha = 0.15, \beta = 0.27$ ) |
| <b>I</b>    | 2.17                                   | 2.17                                  | 2.11                                   | 2.12                                  |
| <b>II</b>   | 2.78                                   | 2.79                                  | 2.72                                   | 2.72                                  |
| <b>III</b>  | 2.47                                   | 2.47                                  | 2.41                                   | 2.42                                  |
| <b>IV</b>   | 2.55                                   | 2.56                                  | 2.50                                   | 2.51                                  |
| <b>V</b>    | 2.10                                   | 2.10                                  | 2.03                                   | 2.04                                  |
| <b>VI</b>   | 2.21                                   | 2.22                                  | 2.16                                   | 2.17                                  |
| <b>VII</b>  | 2.12                                   | 2.13                                  | 2.06                                   | 2.07                                  |
| <b>VIII</b> | 2.11                                   | 2.12                                  | 2.03                                   | 2.04                                  |

<sup>a</sup> In toluene solvent with the dielectric constant of about 2.37.

**Table S12.** The computed values of the SF energy gap (eV) based on the considered solvation models for the experimentally known SF chromophores under study.

| Chromophore | OT-RSHs-PCM                            |                                       | OT-SRSHs <sup>a</sup>                  |                                       |
|-------------|----------------------------------------|---------------------------------------|----------------------------------------|---------------------------------------|
|             | TPSS ( $\alpha = 0.10, \beta = 0.90$ ) | PBE ( $\alpha = 0.15, \beta = 0.85$ ) | TPSS ( $\alpha = 0.10, \beta = 0.32$ ) | PBE ( $\alpha = 0.15, \beta = 0.27$ ) |
| <b>I</b>    | -0.43                                  | -0.39                                 | -0.27                                  | -0.24                                 |
| <b>II</b>   | -0.06                                  | -0.05                                 | 0.10                                   | 0.12                                  |
| <b>III</b>  | -0.09                                  | -0.06                                 | 0.02                                   | 0.04                                  |
| <b>IV</b>   | 0.04                                   | 0.05                                  | 0.11                                   | 0.12                                  |
| <b>V</b>    | -0.47                                  | -0.45                                 | -0.37                                  | -0.36                                 |
| <b>VI</b>   | -0.45                                  | -0.44                                 | -0.36                                  | -0.34                                 |
| <b>VII</b>  | -0.45                                  | -0.43                                 | -0.35                                  | -0.33                                 |
| <b>VIII</b> | -0.43                                  | -0.42                                 | -0.31                                  | -0.30                                 |

<sup>a</sup> In toluene solvent with the dielectric constant of about 2.37.

**Table S13.** The computed values of the TT energy gap (eV) based on the considered solvation models for the experimentally known SF chromophores under study.

| Chromophore | OT-RSHs-PCM                            |                                       | OT-SRSHs <sup>a</sup>                  |                                       |
|-------------|----------------------------------------|---------------------------------------|----------------------------------------|---------------------------------------|
|             | TPSS ( $\alpha = 0.10, \beta = 0.90$ ) | PBE ( $\alpha = 0.15, \beta = 0.85$ ) | TPSS ( $\alpha = 0.10, \beta = 0.32$ ) | PBE ( $\alpha = 0.15, \beta = 0.27$ ) |
| <b>I</b>    | -0.04                                  | -0.04                                 | -0.13                                  | -0.12                                 |
| <b>II</b>   | 0.27                                   | 0.27                                  | 0.17                                   | 0.18                                  |
| <b>III</b>  | 0.02                                   | 0.03                                  | -0.02                                  | -0.01                                 |
| <b>IV</b>   | 0.03                                   | 0.03                                  | -0.02                                  | 0.00                                  |
| <b>V</b>    | -0.51                                  | -0.50                                 | -0.50                                  | -0.49                                 |
| <b>VI</b>   | -0.55                                  | -0.55                                 | -0.55                                  | -0.55                                 |
| <b>VII</b>  | -0.49                                  | -0.48                                 | -0.48                                  | -0.47                                 |
| <b>VIII</b> | -0.49                                  | -0.48                                 | -0.48                                  | -0.48                                 |

<sup>a</sup> In toluene solvent with the dielectric constant of about 2.37.

**Table S14.** The computed values of the singlet and first triplet excitation energies as well as the SF energy gaps (eV) based on the considered solvation models for some of the experimentally known SF chromophores at the optimized geometries in the solvent. <sup>a</sup>

| Chromophore             | OT-RSHs-PCM                            |                                       | OT-SRSHs                               |                                       |
|-------------------------|----------------------------------------|---------------------------------------|----------------------------------------|---------------------------------------|
|                         | TPSS ( $\alpha = 0.10, \beta = 0.90$ ) | PBE ( $\alpha = 0.15, \beta = 0.85$ ) | TPSS ( $\alpha = 0.10, \beta = 0.32$ ) | PBE ( $\alpha = 0.15, \beta = 0.27$ ) |
|                         | Singlet excitation energy              |                                       | Singlet excitation energy              |                                       |
| <b>II</b> <sup>b</sup>  |                                        |                                       | 2.79                                   | 2.78                                  |
| <b>III</b> <sup>c</sup> |                                        |                                       | 2.35                                   | 2.35                                  |
| <b>IV</b> <sup>d</sup>  | 2.52                                   | 2.52                                  | 2.36                                   | 2.37                                  |
|                         | First triplet excitation energy        |                                       | First triplet excitation energy        |                                       |
| <b>II</b> <sup>b</sup>  |                                        |                                       | 1.45                                   | 1.45                                  |
| <b>III</b> <sup>c</sup> |                                        |                                       | 1.19                                   | 1.19                                  |
| <b>IV</b> <sup>d</sup>  | 1.28                                   | 1.29                                  | 1.24                                   | 1.25                                  |
|                         | SF energy gap                          |                                       | SF energy gap                          |                                       |
| <b>II</b> <sup>b</sup>  |                                        |                                       | 0.10                                   | 0.12                                  |
| <b>III</b> <sup>c</sup> |                                        |                                       | 0.02                                   | 0.04                                  |
| <b>IV</b> <sup>d</sup>  | 0.04                                   | 0.06                                  | 0.11                                   | 0.13                                  |

<sup>a</sup> In toluene solvent with the dielectric constant of about 2.37.

<sup>b</sup> The values of the range-separation parameter were found to be 0.2034 and 0.1912 Bohr<sup>-1</sup> for the combinations of  $\alpha = 0.10, \beta = 0.90$  and  $\alpha = 0.15, \beta = 0.85$ , respectively.

<sup>c</sup> The values of the range-separation parameter were found to be 0.1569 and 0.1495 Bohr<sup>-1</sup> for the combinations of  $\alpha = 0.10, \beta = 0.90$  and  $\alpha = 0.15, \beta = 0.85$ , respectively.

<sup>d</sup>The values of the range-separation parameter were found to be 0.1413 and 0.1342 Bohr<sup>-1</sup> for the combinations of  $\alpha = 0.10, \beta = 0.90$  and  $\alpha = 0.15, \beta = 0.85$ , respectively.

**Table S15.** The computed values of the singlet excitation energies (eV) using the best proposed OT-RSHs in this work for the theoretically designed chromophores.

| Chromophore  | TPSS ( $\alpha = 0.10, \beta = 0.90$ ) | PBE ( $\alpha = 0.15, \beta = 0.85$ ) |
|--------------|----------------------------------------|---------------------------------------|
| <b>IX</b>    | 2.12                                   | 2.12                                  |
| <b>X</b>     | 2.04                                   | 2.04                                  |
| <b>XI</b>    | 1.56                                   | 1.56                                  |
| <b>XII</b>   | 2.55                                   | 2.54                                  |
| <b>XIII</b>  | 2.78                                   | 2.76                                  |
| <b>XIV</b>   | 2.52                                   | 2.52                                  |
| <b>XV</b>    | 2.60                                   | 2.60                                  |
| <b>XVI</b>   | 2.39                                   | 2.39                                  |
| <b>XVII</b>  | 2.11                                   | 2.11                                  |
| <b>XVIII</b> | 2.10                                   | 2.10                                  |
| <b>XIX</b>   | 2.14                                   | 2.14                                  |



**Table S16.** The computed values of the first triplet excitation energies (eV) using the best proposed OT-RSHs in this work for the theoretically designed chromophores.

| Chromophore  | TPSS ( $\alpha = 0.10, \beta = 0.90$ ) | PBE ( $\alpha = 0.15, \beta = 0.85$ ) |
|--------------|----------------------------------------|---------------------------------------|
| <b>IX</b>    | 0.81                                   | 0.81                                  |
| <b>X</b>     | 0.78                                   | 0.78                                  |
| <b>XI</b>    | 0.05                                   | 0.06                                  |
| <b>XII</b>   | 1.05                                   | 1.06                                  |
| <b>XIII</b>  | 1.49                                   | 1.50                                  |
| <b>XIV</b>   | 1.26                                   | 1.26                                  |
| <b>XV</b>    | 1.23                                   | 1.24                                  |
| <b>XVI</b>   | 1.12                                   | 1.13                                  |
| <b>XVII</b>  | 0.79                                   | 0.79                                  |
| <b>XVIII</b> | 0.78                                   | 0.79                                  |
| <b>XIX</b>   | 0.81                                   | 0.82                                  |

**Table S17.** The computed values of the second triplet excitation energies (eV) using the best proposed OT-RSHs in this work for the theoretically designed chromophores.

| Chromophore  | TPSS ( $\alpha = 0.10, \beta = 0.90$ ) | PBE ( $\alpha = 0.15, \beta = 0.85$ ) |
|--------------|----------------------------------------|---------------------------------------|
| <b>IX</b>    | 2.09                                   | 2.09                                  |
| <b>X</b>     | 2.04                                   | 2.05                                  |
| <b>XI</b>    | 1.21                                   | 1.22                                  |
| <b>XII</b>   | 2.10                                   | 2.11                                  |
| <b>XIII</b>  | 2.49                                   | 2.45                                  |
| <b>XIV</b>   | 2.48                                   | 2.48                                  |
| <b>XV</b>    | 2.46                                   | 2.47                                  |
| <b>XVI</b>   | 2.36                                   | 2.37                                  |
| <b>XVII</b>  | 2.06                                   | 2.07                                  |
| <b>XVIII</b> | 2.04                                   | 2.05                                  |
| <b>XIX</b>   | 2.17                                   | 2.18                                  |

**Table S18.** The computed values of the SF and TT energy gaps (eV) using the best proposed OT-RSHs in this work for the theoretically designed chromophores.

| Chromophore  | SF energy gap                          |                                       | TT energy gap                          |                                       |
|--------------|----------------------------------------|---------------------------------------|----------------------------------------|---------------------------------------|
|              | TPSS ( $\alpha = 0.10, \beta = 0.90$ ) | PBE ( $\alpha = 0.15, \beta = 0.85$ ) | TPSS ( $\alpha = 0.10, \beta = 0.90$ ) | PBE ( $\alpha = 0.15, \beta = 0.85$ ) |
| <b>IX</b>    | -0.51                                  | -0.50                                 | -0.48                                  | -0.47                                 |
| <b>X</b>     | -0.49                                  | -0.48                                 | -0.49                                  | -0.48                                 |
| <b>XI</b>    | -1.46                                  | -1.43                                 | -1.10                                  | -1.09                                 |
| <b>XII</b>   | -0.45                                  | -0.43                                 | 0.00                                   | 0.00                                  |
| <b>XIII</b>  | 0.19                                   | 0.24                                  | 0.49                                   | 0.54                                  |
| <b>XIV</b>   | 0.00                                   | 0.01                                  | 0.04                                   | 0.05                                  |
| <b>XV</b>    | -0.13                                  | -0.12                                 | 0.01                                   | 0.02                                  |
| <b>XVI</b>   | -0.15                                  | -0.13                                 | -0.12                                  | -0.11                                 |
| <b>XVII</b>  | -0.54                                  | -0.52                                 | -0.49                                  | -0.49                                 |
| <b>XVIII</b> | -0.54                                  | -0.53                                 | -0.48                                  | -0.47                                 |
| <b>XIX</b>   | -0.52                                  | -0.50                                 | -0.54                                  | -0.54                                 |
